# Supplementary material
Source: Springer Nature journal article supplement (https://www.springermedizin.de/resource/supplementary/12903_2011_204_MOESM5_ESM.pdf/9516352)
Supplement: MOESM5 [file 9516352]

## Eligible patients:

- Were not involved in any concurrent study which could affect the parameters being investigated in this trial
- Were aged 18-60 years at the time of recruitment
- Were regular dental attenders who had previously had a single-visit scale and polish
- Had BPE sextant codes less than 3 (i.e. code 0, 1, or 2)
- Did not, in the opinion of their family dental practitioner, require more extensive periodontal therapy
- Did not require antibiotic prophylaxis prior to single-visit scale and polish
- Had a minimum 20 natural teeth (these could be crowned)
- Had less than four actively decayed teeth (i.e. excluded if DT>3)
- Did not have a fixed or removable orthodontic appliance, a removable prosthetic appliance, or a removable acrylic splint
- Were generally fit and well, with no systemic conditions or medication that could predispose periodontal disease e.g.
  - *Diabetes Mellitus*
  - *Hereditary Gingival Fibromatosis*
  - *Von Recklinghausen's Disease (Neurofibromatosis I)*
  - *Neutrophil impairments e.g.*
    - *Agranulocytosis*
    - *Cyclic neutropenia*
    - *Lazy leukocyte syndrome*
    - *Chediak-Higashi syndrome*
    - *Downs Syndrome*
    - *Papillon-Lefevre syndrome*
    - *Chronic granulomatous disease*
  - *Drug Therapies e.g.*
    - *Phenytoin*
    - *Cyclosporin*
    - *Ca channel blockers e.g. Nifedipine*
    - *Sodium Valproate*
    - *Prednisolone*
    - *Long term NSAID therapy*
    - *Chemotherapy*
  - *Immunosuppressive conditions including HIV/AIDS*
  - *Leukaemia*
  - *Post-head-&-neck-carcinoma irradiation*
  - *Pregnancy/Lactating females*
  - *Rheumatoid Arthritis*
